# Supplementary material for: Stimulation of Lignan Production in Schisandra rubriflora In Vitro Cultures by Elicitation
Source: MDPI journal article supplement (doi:10.3390/molecules27196681), 2022-10-07
Supplement: s1 [file s1]

SUPPLEMENTARY DATA

# Stimulation of Lignan Production in *Schisandra rubriflora* In Vitro Cultures by Elicitation

Agnieszka Szopa <sup>1,\*</sup>, Michał Dziurka <sup>2</sup>, Paweł Kubica <sup>1</sup>, Karolina Jaferník <sup>1</sup>, Oliwia Siomak <sup>1</sup> and Halina Ekiert <sup>1</sup>

<sup>1</sup> Chair and Department of Pharmaceutical Botany, Jagiellonian University, Medical College, ul. Medyczna 9, 30-688 Kraków, Poland

<sup>2</sup> Polish Academy of Sciences The Franciszek Górski Institute of Plant Physiology, ul. Niezapominajek 21, 30-239 Kraków, Poland

\* Correspondence: a.szopa@uj.edu.pl; Tel.: +48-12-620-54-30; Fax: +48-620-54-40

Table S1. The lignan production (mg/100 g DW $\pm$ SD) in experimental F and M lines of *S. rubriflora* microshoot cultures - control; traces = <0.05 mg/100 g DW.

| Lignans                            | Time of biomass harvesting (without elicitation) |                                      |                                    |                                      |                                    |                                      |                                     |                                      |                                    |                                     |
|------------------------------------|--------------------------------------------------|--------------------------------------|------------------------------------|--------------------------------------|------------------------------------|--------------------------------------|-------------------------------------|--------------------------------------|------------------------------------|-------------------------------------|
|                                    | 24h                                              |                                      | 48h                                |                                      | 4 days                             |                                      | 6 days                              |                                      | 8 days                             |                                     |
|                                    | F                                                | M                                    | F                                  | M                                    | F                                  | M                                    | F                                   | M                                    | F                                  | M                                   |
| <b>Wulignan A1</b>                 | 0.10 $\pm$ 0.01                                  | 0.02 $\pm$ 0.002                     | 0.10 $\pm$ 0.01                    | traces*                              | 0.16 $\pm$ 0.02                    | 0.05 $\pm$ 0.01                      | 0.15 $\pm$ 0.02                     | 0.06 $\pm$ 0.01                      | 0.09 $\pm$ 0.01                    | 0.05 $\pm$ 0.003                    |
| <b>Rubisandrin A</b>               | traces                                           | 0.06 $\pm$ 0.01                      | traces                             | traces                               | traces                             | traces                               | traces                              | traces                               | traces                             | traces                              |
| <b>Intheriotherin C</b>            | traces                                           | traces                               | traces                             | traces                               | traces                             | traces                               | traces                              | traces                               | traces                             | traces                              |
| <b>Schisandrin</b>                 | 13.90 $\pm$ 0.82                                 | 23.00 $\pm$ 2.46                     | 16.67 $\pm$ 1.92                   | 40.74 $\pm$ 4.64                     | 11.17 $\pm$ 1.19                   | 46.47 $\pm$ 4.94                     | 16.52 $\pm$ 2.11                    | 36.64 $\pm$ 4.89                     | 11.69 $\pm$ 1.02                   | 31.38 $\pm$ 1.95                    |
| <b>Gomisin D</b>                   | 1.08 $\pm$ 0.06                                  | 6.48 $\pm$ 0.69                      | 1.47 $\pm$ 0.17                    | 12.72 $\pm$ 1.45                     | 1.69 $\pm$ 0.18                    | 17.45 $\pm$ 1.85                     | 1.45 $\pm$ 0.19                     | 11.97 $\pm$ 1.60                     | 1.38 $\pm$ 0.12                    | 10.00 $\pm$ 0.62                    |
| <b>Gomisin J</b>                   | 0.37 $\pm$ 0.02                                  | 3.28 $\pm$ 0.35                      | 0.65 $\pm$ 0.08                    | 7.66 $\pm$ 0.87                      | 0.56 $\pm$ 0.06                    | 6.72 $\pm$ 0.71                      | 0.37 $\pm$ 0.05                     | 3.19 $\pm$ 0.43                      | 0.36 $\pm$ 0.03                    | 3.52 $\pm$ 0.22                     |
| <b>Gomisin A</b>                   | 4.60 $\pm$ 0.27                                  | 27.66 $\pm$ 2.96                     | 5.66 $\pm$ 0.65                    | 46.22 $\pm$ 5.26                     | 6.15 $\pm$ 0.65                    | 55.88 $\pm$ 5.94                     | 5.06 $\pm$ 0.65                     | 42.04 $\pm$ 5.61                     | 4.77 $\pm$ 0.42                    | 37.39 $\pm$ 2.33                    |
| <b>Gomisin G</b>                   | 3.40 $\pm$ 0.20                                  | 1.78 $\pm$ 0.19                      | 3.45 $\pm$ 0.40                    | 3.16 $\pm$ 0.36                      | 2.59 $\pm$ 0.28                    | 4.31 $\pm$ 0.46                      | 3.99 $\pm$ 0.51                     | 2.83 $\pm$ 0.38                      | 3.35 $\pm$ 0.29                    | 2.46 $\pm$ 0.15                     |
| <b>Licarín B</b>                   | 0.15 $\pm$ 0.01                                  | 0.06 $\pm$ 0.01                      | 0.12 $\pm$ 0.01                    | 0.11 $\pm$ 0.01                      | 0.16 $\pm$ 0.02                    | 0.05 $\pm$ 0.01                      | 0.26 $\pm$ 0.03                     | 0.18 $\pm$ 0.02                      | 0.14 $\pm$ 0.01                    | 0.14 $\pm$ 0.01                     |
| <b>Epigomisin O</b>                | 0.60 $\pm$ 0.04                                  | 0.07 $\pm$ 0.01                      | 0.64 $\pm$ 0.07                    | 0.17 $\pm$ 0.02                      | 0.38 $\pm$ 0.04                    | 0.19 $\pm$ 0.02                      | 0.61 $\pm$ 0.08                     | 0.15 $\pm$ 0.02                      | 0.52 $\pm$ 0.05                    | 0.18 $\pm$ 0.01                     |
| <b>Gomisin O</b>                   | 2.49 $\pm$ 0.15                                  | 0.28 $\pm$ 0.03                      | 3.48 $\pm$ 0.40                    | 0.78 $\pm$ 0.09                      | 1.84 $\pm$ 0.20                    | 0.84 $\pm$ 0.09                      | 2.88 $\pm$ 0.37                     | 0.55 $\pm$ 0.07                      | 2.68 $\pm$ 0.23                    | 0.76 $\pm$ 0.05                     |
| <b>Meso-dihydroguaiaretic acid</b> | traces                                           | traces                               | traces                             | 0.07 $\pm$ 0.01                      | traces                             | 0.07 $\pm$ 0.01                      | traces                              | traces                               | traces                             | traces                              |
| <b>Schisantherin A</b>             | 2.90 $\pm$ 0.17                                  | 0.14 $\pm$ 0.01                      | 2.72 $\pm$ 0.31                    | 0.27 $\pm$ 0.03                      | 1.80 $\pm$ 0.19                    | 0.25 $\pm$ 0.03                      | 2.89 $\pm$ 0.37                     | 0.20 $\pm$ 0.03                      | 2.64 $\pm$ 0.23                    | 0.29 $\pm$ 0.02                     |
| <b>Schisantherin B</b>             | 1.84 $\pm$ 0.11                                  | 3.31 $\pm$ 0.35                      | 2.06 $\pm$ 0.24                    | 7.78 $\pm$ 0.89                      | 1.50 $\pm$ 0.16                    | 7.46 $\pm$ 0.79                      | 1.99 $\pm$ 0.25                     | 5.35 $\pm$ 0.71                      | 1.84 $\pm$ 0.16                    | 5.09 $\pm$ 0.32                     |
| <b>Licarín A</b>                   | 9.94 $\pm$ 0.59                                  | 1.65 $\pm$ 0.18                      | 12.94 $\pm$ 1.49                   | 2.53 $\pm$ 0.29                      | 14.58 $\pm$ 1.55                   | 4.30 $\pm$ 0.46                      | 22.54 $\pm$ 2.87                    | 4.83 $\pm$ 0.64                      | 11.61 $\pm$ 1.01                   | 6.06 $\pm$ 0.38                     |
| <b>Schisanhenol</b>                | 5.94 $\pm$ 0.35                                  | 1.50 $\pm$ 0.16                      | 5.65 $\pm$ 0.65                    | 3.52 $\pm$ 0.40                      | 4.17 $\pm$ 0.44                    | 2.87 $\pm$ 0.31                      | 6.84 $\pm$ 0.87                     | 2.35 $\pm$ 0.31                      | 5.36 $\pm$ 0.47                    | 2.15 $\pm$ 0.15                     |
| <b>Deoxyschisandrin</b>            | 11.79 $\pm$ 0.70                                 | 34.21 $\pm$ 3.66                     | 15.06 $\pm$ 1.73                   | 67.13 $\pm$ 7.64                     | 11.17 $\pm$ 1.19                   | 57.36 $\pm$ 6.09                     | 15.20 $\pm$ 1.94                    | 49.24 $\pm$ 6.57                     | 12.53 $\pm$ 1.09                   | 44.70 $\pm$ 2.80                    |
| <b>Fragransin A</b>                | traces                                           | traces                               | traces                             | traces                               | traces                             | traces                               | traces                              | traces                               | traces                             | traces                              |
| <b>Pregomisin</b>                  | traces                                           | traces                               | traces                             | traces                               | traces                             | traces                               | traces                              | traces                               | traces                             | traces                              |
| <b>Gomisin N</b>                   | 2.95 $\pm$ 0.17                                  | 6.78 $\pm$ 0.73                      | 3.00 $\pm$ 0.35                    | 14.14 $\pm$ 1.61                     | 2.08 $\pm$ 0.22                    | 13.07 $\pm$ 1.39                     | 2.53 $\pm$ 0.32                     | 9.49 $\pm$ 1.27                      | 2.82 $\pm$ 0.25                    | 9.14 $\pm$ 0.57                     |
| <b>6-O-benzylgomisin O</b>         | 0.51 $\pm$ 0.03                                  | 0.29 $\pm$ 0.03                      | 0.53 $\pm$ 0.06                    | 0.74 $\pm$ 0.08                      | 0.37 $\pm$ 0.04                    | 0.63 $\pm$ 0.07                      | 0.56 $\pm$ 0.07                     | 0.40 $\pm$ 0.05                      | 0.54 $\pm$ 0.05                    | 0.43 $\pm$ 0.03                     |
| <b>Schisandrin C</b>               | 0.19 $\pm$ 0.01                                  | 1.44 $\pm$ 0.15                      | 0.23 $\pm$ 0.03                    | 2.74 $\pm$ 0.31                      | 0.23 $\pm$ 0.03                    | 2.50 $\pm$ 0.27                      | 0.20 $\pm$ 0.01                     | 1.99 $\pm$ 0.27                      | 0.24 $\pm$ 0.02                    | 1.72 $\pm$ 0.11                     |
| <b>Total content</b>               | <b>62.80 <math>\pm</math> 3.72</b>               | <b>112.10 <math>\pm</math> 11.98</b> | <b>74.50 <math>\pm</math> 8.56</b> | <b>210.60 <math>\pm</math> 23.98</b> | <b>60.70 <math>\pm</math> 6.44</b> | <b>220.50 <math>\pm</math> 23.43</b> | <b>84.10 <math>\pm</math> 10.72</b> | <b>171.60 <math>\pm</math> 22.90</b> | <b>62.70 <math>\pm</math> 5.45</b> | <b>155.77 <math>\pm</math> 9.71</b> |

Table S2. The lignan production (mg/100 g DW $\pm$ SD) in experimental F and M lines of *S. rubriflora* microshoot cultures after elicitation with chitosan; traces = <0.05 mg/100 g DW.

| Lignans                            | Time of biomass harvesting after elicitation |                                     |                                    |                                      |                                    |                                     |                                    |                                      |                                    |                                      |
|------------------------------------|----------------------------------------------|-------------------------------------|------------------------------------|--------------------------------------|------------------------------------|-------------------------------------|------------------------------------|--------------------------------------|------------------------------------|--------------------------------------|
|                                    | 24h                                          |                                     | 48h                                |                                      | 4 days                             |                                     | 6 days                             |                                      | 8 days                             |                                      |
|                                    | F                                            | M                                   | F                                  | M                                    | F                                  | M                                   | F                                  | M                                    | F                                  | M                                    |
| <b>Wulignan A1</b>                 | 0.11 $\pm$ 0.003                             | 0.05 $\pm$ 0.01                     | 0.10 $\pm$ 0.01                    | 0.10 $\pm$ 0.01                      | 0.16 $\pm$ 0.02                    | 0.08 $\pm$ 0.01                     | 0.36 $\pm$ 0.04                    | 0.11 $\pm$ 0.01                      | 0.31 $\pm$ 0.02                    | 0.08 $\pm$ 0.01                      |
| <b>Rubisandrin A</b>               | traces                                       | traces                              | traces                             | traces                               | traces                             | traces                              | traces                             | traces                               | traces                             | traces                               |
| <b>Intheriotherin C</b>            | 0.11 $\pm$ 0.003                             | 0.05 $\pm$ 0.01                     | 0.10 $\pm$ 0.01                    | 0.10 $\pm$ 0.01                      | 0.16 $\pm$ 0.02                    | 0.08 $\pm$ 0.01                     | 0.36 $\pm$ 0.04                    | 0.11 $\pm$ 0.01                      | traces                             | traces                               |
| <b>Schisandrin</b>                 | 11.64 $\pm$ 0.36                             | 34.26 $\pm$ 3.79                    | 11.20 $\pm$ 1.12                   | 61.85 $\pm$ 6.28                     | 5.82 $\pm$ 0.62                    | 43.38 $\pm$ 3.25                    | 16.20 $\pm$ 1.69                   | 46.50 $\pm$ 3.25                     | 8.27 $\pm$ 0.67                    | 37.83 $\pm$ 2.39                     |
| <b>Gomisin D</b>                   | 0.55 $\pm$ 0.02                              | 11.02 $\pm$ 1.22                    | 1.09 $\pm$ 0.11                    | 24.47 $\pm$ 2.48                     | 0.69 $\pm$ 0.07                    | 15.02 $\pm$ 1.13                    | 1.48 $\pm$ 0.15                    | 15.18 $\pm$ 1.06                     | 0.57 $\pm$ 0.05                    | 12.26 $\pm$ 0.78                     |
| <b>Gomisin J</b>                   | 0.24 $\pm$ 0.01                              | 7.17 $\pm$ 0.79                     | 0.44 $\pm$ 0.04                    | 11.58 $\pm$ 1.18                     | 0.29 $\pm$ 0.03                    | 8.84 $\pm$ 0.66                     | 0.60 $\pm$ 0.06                    | 8.18 $\pm$ 0.57                      | 0.22 $\pm$ 0.02                    | 5.79 $\pm$ 0.37                      |
| <b>Gomisin A</b>                   | 3.00 $\pm$ 0.09                              | 51.10 $\pm$ 5.65                    | 3.84 $\pm$ 0.38                    | 81.59 $\pm$ 8.28                     | 2.92 $\pm$ 0.31                    | 56.64 $\pm$ 4.25                    | 5.62 $\pm$ 0.59                    | 53.51 $\pm$ 3.74                     | 1.77 $\pm$ 0.15                    | 45.03 $\pm$ 2.84                     |
| <b>Gomisin G</b>                   | 3.33 $\pm$ 0.10                              | 3.39 $\pm$ 0.38                     | 3.42 $\pm$ 0.34                    | 5.94 $\pm$ 0.60                      | 1.95 $\pm$ 0.21                    | 3.75 $\pm$ 0.28                     | 3.13 $\pm$ 0.33                    | 3.81 $\pm$ 0.27                      | 2.71 $\pm$ 0.22                    | 2.66 $\pm$ 0.17                      |
| <b>Licarin B</b>                   | 0.10 $\pm$ 0.003                             | 0.07 $\pm$ 0.01                     | 0.14 $\pm$ 0.01                    | 0.14 $\pm$ 0.01                      | 0.05 $\pm$ 0.01                    | traces                              | 0.11 $\pm$ 0.01                    | 0.15 $\pm$ 0.01                      | 0.09 $\pm$ 0.01                    | 0.13 $\pm$ 0.01                      |
| <b>Epigomisin O</b>                | 0.43 $\pm$ 0.01                              | 0.13 $\pm$ 0.01                     | 0.59 $\pm$ 0.06                    | 0.24 $\pm$ 0.03                      | 0.23 $\pm$ 0.03                    | 0.14 $\pm$ 0.01                     | 0.57 $\pm$ 0.06                    | 0.17 $\pm$ 0.01                      | 0.33 $\pm$ 0.03                    | 0.12 $\pm$ 0.01                      |
| <b>Gomisin O</b>                   | 2.59 $\pm$ 0.08                              | 0.63 $\pm$ 0.1                      | 3.10 $\pm$ 0.31                    | 1.43 $\pm$ 0.15                      | 1.42 $\pm$ 0.15                    | 0.76 $\pm$ 0.06                     | 2.78 $\pm$ 0.30                    | 0.88 $\pm$ 0.06                      | 1.84 $\pm$ 0.15                    | 0.61 $\pm$ 0.04                      |
| <b>Meso-dihydroguaiaretic acid</b> | 0.07 $\pm$ 0.002                             | 0.06 $\pm$ 0.01                     | 0.09 $\pm$ 0.01                    | 0.09 $\pm$ 0.01                      | traces                             | 0.09 $\pm$ 0.01                     | 0.08 $\pm$ 0.01                    | 0.10 $\pm$ 0.01                      | 0.07 $\pm$ 0.01                    | 0.07 $\pm$ 0.01                      |
| <b>Schisantherin A</b>             | 2.38 $\pm$ 0.07                              | 0.16 $\pm$ 0.02                     | 2.29 $\pm$ 0.23                    | 0.33 $\pm$ 0.03                      | 1.43 $\pm$ 0.15                    | 0.16 $\pm$ 0.01                     | 2.33 $\pm$ 0.24                    | 0.35 $\pm$ 0.03                      | 1.38 $\pm$ 0.11                    | 0.19 $\pm$ 0.01                      |
| <b>Schisantherin B</b>             | 1.32 $\pm$ 0.04                              | 6.69 $\pm$ 0.74                     | 1.54 $\pm$ 0.15                    | 12.57 $\pm$ 1.28                     | 0.88 $\pm$ 0.09                    | 7.50 $\pm$ 0.56                     | 1.85 $\pm$ 0.19                    | 10.04 $\pm$ 0.70                     | 1.00 $\pm$ 0.08                    | 7.45 $\pm$ 0.47                      |
| <b>Licarin A</b>                   | 12.30 $\pm$ 0.38                             | 5.81 $\pm$ 0.64                     | 14.85 $\pm$ 1.48                   | 10.50 $\pm$ 1.07                     | 20.41 $\pm$ 2.15                   | 10.12 $\pm$ 0.76                    | 34.71 $\pm$ 3.62                   | 11.52 $\pm$ 0.81                     | 31.81 $\pm$ 2.60                   | 8.97 $\pm$ 0.56                      |
| <b>Schisanhenol</b>                | 6.06 $\pm$ 0.19                              | 2.19 $\pm$ 0.24                     | 5.74 $\pm$ 0.57                    | 4.14 $\pm$ 0.42                      | 3.32 $\pm$ 0.35                    | 2.82 $\pm$ 0.21                     | 6.94 $\pm$ 0.72                    | 3.43 $\pm$ 0.24                      | 4.79 $\pm$ 0.39                    | 2.48 $\pm$ 0.16                      |
| <b>Deoxyschisandrin</b>            | 8.69 $\pm$ 0.27                              | 53.87 $\pm$ 5.96                    | 9.05 $\pm$ 0.90                    | 82.87 $\pm$ 8.41                     | 6.61 $\pm$ 0.70                    | 58.91 $\pm$ 4.42                    | 14.50 $\pm$ 1.51                   | 77.72 $\pm$ 5.44                     | 7.39 $\pm$ 0.60                    | 59.76 $\pm$ 3.76                     |
| <b>Fragransin A</b>                | traces                                       | traces                              | traces                             | traces                               | traces                             | traces                              | traces                             | traces                               | traces                             | traces                               |
| <b>Pregomisin</b>                  | traces                                       | traces                              | traces                             | traces                               | traces                             | traces                              | traces                             | traces                               | traces                             | traces                               |
| <b>Gomisin N</b>                   | 2.15 $\pm$ 0.07                              | 13.88 $\pm$ 1.53                    | 2.26 $\pm$ 0.23                    | 20.49 $\pm$ 2.08                     | 1.53 $\pm$ 0.16                    | 13.65 $\pm$ 1.02                    | 3.08 $\pm$ 0.32                    | 18.82 $\pm$ 1.32                     | 1.55 $\pm$ 0.13                    | 13.85 $\pm$ 0.88                     |
| <b>6-O-Benzylgomisin O</b>         | 0.42 $\pm$ 0.01                              | 0.58 $\pm$ 0.06                     | 0.44 $\pm$ 0.04                    | 0.79 $\pm$ 0.08                      | 0.28 $\pm$ 0.03                    | 0.56 $\pm$ 0.04                     | 0.49 $\pm$ 0.05                    | 0.71 $\pm$ 0.05                      | 0.33 $\pm$ 0.03                    | 0.49 $\pm$ 0.03                      |
| <b>Schisandrin C</b>               | traces                                       | 2.98 $\pm$ 0.33                     | 0.16 $\pm$ 0.02                    | 4.16 $\pm$ 0.42                      | 0.12 $\pm$ 0.01                    | 2.77 $\pm$ 0.21                     | 0.19 $\pm$ 0.02                    | 3.17 $\pm$ 0.22                      | 0.08 $\pm$ 0.01                    | 2.43 $\pm$ 0.15                      |
| <b>Total content</b>               | <b>55.50 <math>\pm</math> 1.32</b>           | <b>194.10 <math>\pm</math> 1.46</b> | <b>60.30 <math>\pm</math> 6.03</b> | <b>323.30 <math>\pm</math> 32.81</b> | <b>48.20 <math>\pm</math> 5.09</b> | <b>225.20 <math>\pm</math> 6.88</b> | <b>95.00 <math>\pm</math> 9.95</b> | <b>254.40 <math>\pm</math> 17.81</b> | <b>64.55 <math>\pm</math> 5.24</b> | <b>200.21 <math>\pm</math> 12.62</b> |

Table S3. The lignan production (mg/100 g DW $\pm$ SD) in experimental F and M lines of *S. rubriflora* microshoot cultures after elicitation with yeast extract; traces = <0.05 mg/100 g DW.

| Lignans                            | Time of biomass harvesting after elicitation |                                      |                                    |                                      |                                    |                                      |                                     |                                      |                                      |                                      |
|------------------------------------|----------------------------------------------|--------------------------------------|------------------------------------|--------------------------------------|------------------------------------|--------------------------------------|-------------------------------------|--------------------------------------|--------------------------------------|--------------------------------------|
|                                    | 24h                                          |                                      | 48h                                |                                      | 4 days                             |                                      | 6 days                              |                                      | 8 days                               |                                      |
|                                    | F                                            | M                                    | F                                  | M                                    | F                                  | M                                    | F                                   | M                                    | F                                    | M                                    |
| <b>Wulignan A1</b>                 | 0.05 $\pm$ 0.002                             | traces                               | traces                             | traces                               | 0.11 $\pm$ 0.01                    | traces                               | 0.26 $\pm$ 0.02                     | traces                               | 0.31 $\pm$ 0.04                      | traces                               |
| <b>Rubisandrin A</b>               | traces                                       | traces                               | traces                             | traces                               | traces                             | 0.14 $\pm$ 0.01                      | traces                              | 0.19 $\pm$ 0.01                      | traces                               | 0.15 $\pm$ 0.01                      |
| <b>Intheriotherin C</b>            | traces                                       | traces                               | traces                             | traces                               | traces                             | traces                               | traces                              | traces                               | traces                               | traces                               |
| <b>Schisandrin</b>                 | 11.09 $\pm$ 0.49                             | 60.19 $\pm$ 5.65                     | 9.83 $\pm$ 1.11                    | 56.37 $\pm$ 4.50                     | 10.43 $\pm$ 0.63                   | 70.80 $\pm$ 5.71                     | 14.74 $\pm$ 0.88                    | 57.94 $\pm$ 4.13                     | 17.49 $\pm$ 2.02                     | 47.87 $\pm$ 3.68                     |
| <b>Gomisin D</b>                   | 1.19 $\pm$ 0.05                              | 21.45 $\pm$ 2.05                     | 0.36 $\pm$ 0.04                    | 20.04 $\pm$ 1.60                     | 1.97 $\pm$ 0.12                    | 25.86 $\pm$ 2.13                     | 2.84 $\pm$ 0.17                     | 20.12 $\pm$ 1.44                     | 1.66 $\pm$ 0.2                       | 17.35 $\pm$ 1.33                     |
| <b>Gomisin J</b>                   | 0.54 $\pm$ 0.02                              | 13.67 $\pm$ 1.16                     | 0.14 $\pm$ 0.02                    | 10.17 $\pm$ 0.81                     | 0.78 $\pm$ 0.05                    | 14.11 $\pm$ 1.19                     | 1.47 $\pm$ 0.09                     | 12.37 $\pm$ 0.88                     | 0.63 $\pm$ 0.08                      | 8.90 $\pm$ 0.69                      |
| <b>Gomisin A</b>                   | 6.03 $\pm$ 0.27                              | 77.84 $\pm$ 7.38                     | 1.38 $\pm$ 0.16                    | 66.50 $\pm$ 5.31                     | 8.05 $\pm$ 0.49                    | 85.79 $\pm$ 6.96                     | 11.32 $\pm$ 0.68                    | 68.37 $\pm$ 4.87                     | 5.41 $\pm$ 0.65                      | 58.65 $\pm$ 4.51                     |
| <b>Gomisin G</b>                   | 2.65 $\pm$ 0.12                              | 6.19 $\pm$ 0.57                      | 3.06 $\pm$ 0.34                    | 4.26 $\pm$ 0.34                      | 2.59 $\pm$ 0.16                    | 6.53 $\pm$ 0.55                      | 3.06 $\pm$ 0.18                     | 4.74 $\pm$ 0.34                      | 4.08 $\pm$ 0.49                      | 4.25 $\pm$ 0.33                      |
| <b>Licarin B</b>                   | 0.12 $\pm$ 0.01                              | 0.07 $\pm$ 0.01                      | 0.15 $\pm$ 0.02                    | 0.14 $\pm$ 0.01                      | 0.07 $\pm$ 0.004                   | 0.15 $\pm$ 0.01                      | traces                              | 0.06 $\pm$ 0.004                     | 0.16 $\pm$ 0.02                      | 0.07 $\pm$ 0.01                      |
| <b>Epigomisin O</b>                | 0.35 $\pm$ 0.02                              | 0.27 $\pm$ 0.03                      | 0.43 $\pm$ 0.05                    | 0.22 $\pm$ 0.02                      | 0.28 $\pm$ 0.02                    | 0.27 $\pm$ 0.02                      | 0.36 $\pm$ 0.02                     | 0.20 $\pm$ 0.01                      | 0.69 $\pm$ 0.08                      | 0.19 $\pm$ 0.02                      |
| <b>Gomisin O</b>                   | 2.32 $\pm$ 0.10                              | 1.44 $\pm$ 0.13                      | 2.82 $\pm$ 0.32                    | 1.23 $\pm$ 0.10                      | 1.58 $\pm$ 0.10                    | 1.47 $\pm$ 0.12                      | 2.301 $\pm$ 0.14                    | 1.10 $\pm$ 0.08                      | 3.36 $\pm$ 0.41                      | 0.83 $\pm$ 0.06                      |
| <b>Meso-dihydroguaiaretic acid</b> | traces                                       | 0.14 $\pm$ 0.01                      | 0.05 $\pm$ 0.01                    | 0.11 $\pm$ 0.01                      | 0.06 $\pm$ 0.003                   | 0.15 $\pm$ 0.01                      | 0.07 $\pm$ 0.004                    | 0.11 $\pm$ 0.01                      | 0.09 $\pm$ 0.01                      | 0.07 $\pm$ 0.01                      |
| <b>Schisantherin A</b>             | 2.07 $\pm$ 0.09                              | 0.53 $\pm$ 0.04                      | 2.25 $\pm$ 0.25                    | 0.39 $\pm$ 0.03                      | 1.78 $\pm$ 0.11                    | 0.47 $\pm$ 0.04                      | 2.21 $\pm$ 0.13                     | 0.31 $\pm$ 0.02                      | 2.49 $\pm$ 0.27                      | 0.22 $\pm$ 0.02                      |
| <b>Schisantherin B</b>             | 1.51 $\pm$ 0.07                              | 11.81 $\pm$ 1.10                     | 1.21 $\pm$ 0.14                    | 10.65 $\pm$ 0.85                     | 1.61 $\pm$ 0.10                    | 13.34 $\pm$ 1.10                     | 2.12 $\pm$ 0.13                     | 10.69 $\pm$ 0.76                     | 2.18 $\pm$ 0.26                      | 9.02 $\pm$ 0.69                      |
| <b>Licarin A</b>                   | 5.19 $\pm$ 0.23                              | 3.54 $\pm$ 0.34                      | 7.48 $\pm$ 0.84                    | 3.58 $\pm$ 0.29                      | 16.32 $\pm$ 0.99                   | 3.46 $\pm$ 0.26                      | 35.38 $\pm$ 2.11                    | 3.27 $\pm$ 0.23                      | 37.54 $\pm$ 4.51                     | 2.68 $\pm$ 0.21                      |
| <b>Schisanhenol</b>                | 4.03 $\pm$ 0.18                              | 4.02 $\pm$ 0.38                      | 5.60 $\pm$ 0.63                    | 4.02 $\pm$ 0.32                      | 3.94 $\pm$ 0.24                    | 4.67 $\pm$ 0.38                      | 5.53 $\pm$ 0.33                     | 4.08 $\pm$ 0.29                      | 7.52 $\pm$ 0.88                      | 3.31 $\pm$ 0.25                      |
| <b>Deoxyschisandrin</b>            | 10.25 $\pm$ 0.45                             | 85.16 $\pm$ 7.91                     | 7.40 $\pm$ 0.83                    | 77.42 $\pm$ 6.18                     | 11.45 $\pm$ 0.70                   | 94.86 $\pm$ 7.56                     | 17.40 $\pm$ 1.04                    | 80.44 $\pm$ 5.73                     | 16.14 $\pm$ 1.90                     | 69.68 $\pm$ 5.34                     |
| <b>Fragransin A</b>                | traces                                       | traces                               | traces                             | traces                               | traces                             | traces                               | traces                              | traces                               | traces                               | traces                               |
| <b>Pregomisin</b>                  | traces                                       | traces                               | traces                             | traces                               | traces                             | traces                               | traces                              | traces                               | traces                               | traces                               |
| <b>Gomisin N</b>                   | 2.56 $\pm$ 0.11                              | 23.79 $\pm$ 2.14                     | 1.86 $\pm$ 0.21                    | 18.56 $\pm$ 1.48                     | 2.46 $\pm$ 0.15                    | 24.89 $\pm$ 2.05                     | 3.88 $\pm$ 0.23                     | 20.49 $\pm$ 1.46                     | 3.67 $\pm$ 0.43                      | 17.52 $\pm$ 1.34                     |
| <b>6-O-Benzylgomisin O</b>         | 0.41 $\pm$ 0.02                              | 1.21 $\pm$ 0.11                      | 0.44 $\pm$ 0.05                    | 0.89 $\pm$ 0.07                      | 0.35 $\pm$ 0.02                    | 1.12 $\pm$ 0.09                      | 0.48 $\pm$ 0.03                     | 1.12 $\pm$ 0.08                      | 0.64 $\pm$ 0.08                      | 0.85 $\pm$ 0.07                      |
| <b>Schisandrin C</b>               | 0.19 $\pm$ 0.01                              | 5.24 $\pm$ 0.47                      | traces                             | 3.58 $\pm$ 0.29                      | 0.30 $\pm$ 0.02                    | 5.05 $\pm$ 0.42                      | 0.52 $\pm$ 0.03                     | 3.93 $\pm$ 0.28                      | 0.24 $\pm$ 0.03                      | 3.44 $\pm$ 0.27                      |
| <b>Total content</b>               | <b>50.60 <math>\pm</math> 2.22</b>           | <b>316.65 <math>\pm</math> 29.46</b> | <b>44.60 <math>\pm</math> 5.01</b> | <b>278.19 <math>\pm</math> 22.22</b> | <b>64.10 <math>\pm</math> 3.90</b> | <b>353.17 <math>\pm</math> 28.62</b> | <b>103.90 <math>\pm</math> 6.20</b> | <b>289.57 <math>\pm</math> 20.63</b> | <b>104.29 <math>\pm</math> 12.35</b> | <b>245.13 <math>\pm</math> 18.83</b> |

Table S4. The lignan production (mg/100 g DW $\pm$ SD) in experimental F and M lines of *S. rubriflora* microshoot cultures after elicitation with ethephon; traces = <0.05 mg/100 g DW.

| Lignans                            | Time of biomass harvesting after elicitation |                                      |                                      |                                      |                                    |                                      |                                    |                                     |                                    |                                      |
|------------------------------------|----------------------------------------------|--------------------------------------|--------------------------------------|--------------------------------------|------------------------------------|--------------------------------------|------------------------------------|-------------------------------------|------------------------------------|--------------------------------------|
|                                    | 24h                                          |                                      | 48h                                  |                                      | 4 days                             |                                      | 6 days                             |                                     | 8 days                             |                                      |
|                                    | F                                            | M                                    | F                                    | M                                    | F                                  | M                                    | F                                  | M                                   | F                                  | M                                    |
| <b>Wulignan A1</b>                 | traces                                       | traces                               | 0.07 $\pm$ 0.01                      | traces                               | traces                             | traces                               | traces                             | traces                              | traces                             | traces                               |
| <b>Rubisandrin A</b>               | traces                                       | traces                               | traces                               | traces                               | traces                             | traces                               | traces                             | traces                              | traces                             | traces                               |
| <b>Intheriotherin C</b>            | traces                                       | traces                               | traces                               | traces                               | traces                             | traces                               | traces                             | traces                              | traces                             | traces                               |
| <b>Schisandrin</b>                 | 6.20 $\pm$ 0.60                              | 60.64 $\pm$ 6.50                     | 29.61 $\pm$ 3.92                     | 43.15 $\pm$ 3.84                     | 14.90 $\pm$ 0.95                   | 57.02 $\pm$ 2.45                     | 13.74 $\pm$ 0.84                   | 25.62 $\pm$ 1.98                    | 14.52 $\pm$ 1.05                   | 29.40 $\pm$ 2.14                     |
| <b>Gomisin D</b>                   | 0.16 $\pm$ 0.02                              | 20.48 $\pm$ 2.20                     | 3.84 $\pm$ 0.51                      | 15.51 $\pm$ 1.38                     | 0.89 $\pm$ 0.06                    | 22.50 $\pm$ 0.97                     | 1.49 $\pm$ 0.09                    | 7.04 $\pm$ 0.54                     | 1.11 $\pm$ 0.08                    | 6.91 $\pm$ 0.50                      |
| <b>Gomisin J</b>                   | traces                                       | 10.00 $\pm$ 1.07                     | 1.84 $\pm$ 0.24                      | 7.66 $\pm$ 0.68                      | 0.57 $\pm$ 0.04                    | 14.59 $\pm$ 0.63                     | 0.64 $\pm$ 0.04                    | 2.69 $\pm$ 0.21                     | 0.44 $\pm$ 0.03                    | 2.97 $\pm$ 0.22                      |
| <b>Gomisin A</b>                   | 0.74 $\pm$ 0.07                              | 74.62 $\pm$ 8.00                     | 15.90 $\pm$ 2.11                     | 54.04 $\pm$ 4.81                     | 5.78 $\pm$ 0.37                    | 82.32 $\pm$ 3.54                     | 7.04 $\pm$ 0.42                    | 30.24 $\pm$ 2.33                    | 5.86 $\pm$ 0.42                    | 37.00 $\pm$ 2.69                     |
| <b>Gomisin G</b>                   | 1.92 $\pm$ 0.19                              | 4.94 $\pm$ 0.53                      | 6.53 $\pm$ 0.87                      | 3.84 $\pm$ 0.34                      | 4.93 $\pm$ 0.31                    | 6.76 $\pm$ 0.29                      | 3.43 $\pm$ 0.21                    | 1.50 $\pm$ 0.12                     | 4.31 $\pm$ 0.31                    | 2.07 $\pm$ 0.15                      |
| <b>Licarin B</b>                   | 0.11 $\pm$ 0.01                              | 0.07 $\pm$ 0.01                      | 0.41 $\pm$ 0.06                      | 0.24 $\pm$ 0.02                      | 0.17 $\pm$ 0.01                    | 0.10 $\pm$ 0.004                     | 0.22 $\pm$ 0.01                    | 0.11 $\pm$ 0.01                     | 0.15 $\pm$ 0.01                    | 0.14 $\pm$ 0.01                      |
| <b>Epigomisin O</b>                | 0.24 $\pm$ 0.02                              | 0.21 $\pm$ 0.02                      | 1.54 $\pm$ 0.20                      | 0.27 $\pm$ 0.02                      | 0.93 $\pm$ 0.06                    | 0.26 $\pm$ 0.01                      | 0.55 $\pm$ 0.03                    | 0.08 $\pm$ 0.01                     | 0.54 $\pm$ 0.04                    | 0.11 $\pm$ 0.01                      |
| <b>Gomisin O</b>                   | 1.34 $\pm$ 0.13                              | 1.16 $\pm$ 0.12                      | 4.47 $\pm$ 0.59                      | 1.18 $\pm$ 0.11                      | 3.73 $\pm$ 0.24                    | 1.51 $\pm$ 0.07                      | 3.04 $\pm$ 0.19                    | 0.38 $\pm$ 0.03                     | 2.70 $\pm$ 0.19                    | 0.55 $\pm$ 0.04                      |
| <b>Meso-dihydroguaiaretic acid</b> | traces                                       | 0.12 $\pm$ 0.01                      | 0.16 $\pm$ 0.02                      | 0.08 $\pm$ 0.01                      | 0.06 $\pm$ 0.004                   | 0.13 $\pm$ 0.01                      | 0.06 $\pm$ 0.004                   | traces                              | 0.06 $\pm$ 0.004                   | traces                               |
| <b>Schisantherin A</b>             | 1.29 $\pm$ 0.13                              | 0.32 $\pm$ 0.04                      | 5.42 $\pm$ 0.72                      | 0.51 $\pm$ 0.05                      | 3.10 $\pm$ 0.20                    | 0.58 $\pm$ 0.03                      | 2.42 $\pm$ 0.15                    | 0.10 $\pm$ 0.01                     | 3.01 $\pm$ 0.22                    | 0.18 $\pm$ 0.01                      |
| <b>Schisantherin B</b>             | 0.64 $\pm$ 0.06                              | 12.74 $\pm$ 1.37                     | 4.73 $\pm$ 0.63                      | 9.45 $\pm$ 0.84                      | 2.16 $\pm$ 0.14                    | 15.17 $\pm$ 0.65                     | 2.09 $\pm$ 0.13                    | 4.23 $\pm$ 0.33                     | 1.89 $\pm$ 0.14                    | 4.98 $\pm$ 0.36                      |
| <b>Licarin A</b>                   | 2.76 $\pm$ 0.27                              | 2.86 $\pm$ 0.31                      | 6.81 $\pm$ 0.90                      | 2.95 $\pm$ 0.26                      | 3.10 $\pm$ 0.20                    | 6.14 $\pm$ 0.26                      | 5.48 $\pm$ 0.33                    | 3.56 $\pm$ 0.28                     | 5.39 $\pm$ 0.39                    | 2.84 $\pm$ 0.21                      |
| <b>Schisanhenol</b>                | 2.35 $\pm$ 0.23                              | 4.09 $\pm$ 0.44                      | 10.11 $\pm$ 1.34                     | 3.24 $\pm$ 0.29                      | 6.32 $\pm$ 0.40                    | 4.43 $\pm$ 0.19                      | 5.74 $\pm$ 0.35                    | 1.74 $\pm$ 0.13                     | 4.44 $\pm$ 0.32                    | 2.03 $\pm$ 0.15                      |
| <b>Deoxyschisandrin</b>            | 3.58 $\pm$ 0.35                              | 91.53 $\pm$ 9.82                     | 23.55 $\pm$ 3.12                     | 73.33 $\pm$ 6.53                     | 11.58 $\pm$ 0.74                   | 91.58 $\pm$ 3.93                     | 14.19 $\pm$ 0.86                   | 39.93 $\pm$ 3.08                    | 10.53 $\pm$ 0.76                   | 49.35 $\pm$ 3.60                     |
| <b>Fragransin A</b>                | traces                                       | traces                               | traces                               | traces                               | traces                             | traces                               | traces                             | traces                              | traces                             | traces                               |
| <b>Pregomisin</b>                  | traces                                       | traces                               | traces                               | traces                               | traces                             | traces                               | traces                             | traces                              | traces                             | traces                               |
| <b>Gomisin N</b>                   | 0.92 $\pm$ 0.09                              | 22.00 $\pm$ 2.36                     | 7.57 $\pm$ 1.00                      | 17.89 $\pm$ 1.59                     | 3.48 $\pm$ 0.22                    | 25.71 $\pm$ 0.01                     | 3.21 $\pm$ 0.20                    | 7.60 $\pm$ 0.59                     | 3.11 $\pm$ 0.22                    | 10.33 $\pm$ 0.75                     |
| <b>6-O-benzylgomisin O</b>         | 0.21 $\pm$ 0.02                              | 1.01 $\pm$ 0.11                      | 1.40 $\pm$ 0.19                      | 0.89 $\pm$ 0.08                      | 0.82 $\pm$ 0.05                    | 1.21 $\pm$ 0.05                      | 0.51 $\pm$ 0.03                    | 0.29 $\pm$ 0.02                     | 0.54 $\pm$ 0.04                    | 0.42 $\pm$ 0.03                      |
| <b>Schisandrin C</b>               | traces                                       | 3.54 $\pm$ 0.38                      | 0.52 $\pm$ 0.07                      | 2.86 $\pm$ 0.26                      | 0.19 $\pm$ 0.01                    | 4.81 $\pm$ 0.21                      | 0.24 $\pm$ 0.02                    | 1.10 $\pm$ 0.09                     | 0.17 $\pm$ 0.01                    | 1.47 $\pm$ 0.11                      |
| <b>Total content</b>               | <b>22.60 <math>\pm</math> 2.19</b>           | <b>310.40 <math>\pm</math> 33.28</b> | <b>124.50 <math>\pm</math> 16.50</b> | <b>237.10 <math>\pm</math> 21.11</b> | <b>62.80 <math>\pm</math> 4.00</b> | <b>334.90 <math>\pm</math> 14.39</b> | <b>64.10 <math>\pm</math> 3.90</b> | <b>126.30 <math>\pm</math> 9.74</b> | <b>58.80 <math>\pm</math> 4.23</b> | <b>150.80 <math>\pm</math> 10.97</b> |

Table S5. The lignan production (mg/100 g DW $\pm$ SD) in experimental F and M lines of *S. rubriflora* microshoot cultures after elicitation with methyl jasmonate; traces = <0.05 mg/100 g DW.

| Lignans                            | Time of biomass harvesting after elicitation |                                      |                                    |                                      |                                    |                                      |                                    |                                     |                                    |                                     |
|------------------------------------|----------------------------------------------|--------------------------------------|------------------------------------|--------------------------------------|------------------------------------|--------------------------------------|------------------------------------|-------------------------------------|------------------------------------|-------------------------------------|
|                                    | 24h                                          |                                      | 48h                                |                                      | 4 days                             |                                      | 6 days                             |                                     | 8 days                             |                                     |
|                                    | F                                            | M                                    | F                                  | M                                    | F                                  | M                                    | F                                  | M                                   | F                                  | M                                   |
| <b>Wulignan A1</b>                 | 0.07 $\pm$ 0.01                              | traces                               | 0.06 $\pm$ 0.003                   | traces                               | 0.12 $\pm$ 0.01                    | 0.06 $\pm$ 0.01                      | 0.11 $\pm$ 0.01                    | traces                              | traces                             | 0.05 $\pm$ 0.01                     |
| <b>Rubisandrin A</b>               | traces                                       | traces                               | traces                             | traces                               | traces                             | traces                               | traces                             | traces                              | traces                             | traces                              |
| <b>Intheriotherin C</b>            | traces                                       | traces                               | traces                             | traces                               | traces                             | traces                               | traces                             | traces                              | traces                             | traces                              |
| <b>Schisandrin</b>                 | 7.95 $\pm$ 0.94                              | 71.98 $\pm$ 11.33                    | 22.21 $\pm$ 1.24                   | 34.25 $\pm$ 3.07                     | 9.14 $\pm$ 0.80                    | 35.16 $\pm$ 3.30                     | 14.84 $\pm$ 1.42                   | 28.92 $\pm$ 1.23                    | 10.22 $\pm$ 0.92                   | 56.95 $\pm$ 5.09                    |
| <b>Gomisin D</b>                   | 0.23 $\pm$ 0.03                              | 28.80 $\pm$ 4.53                     | 1.97 $\pm$ 0.11                    | 8.30 $\pm$ 0.74                      | 0.45 $\pm$ 0.04                    | 10.59 $\pm$ 0.99                     | 0.59 $\pm$ 0.06                    | 11.42 $\pm$ 0.49                    | 0.77 $\pm$ 0.07                    | 18.53 $\pm$ 1.66                    |
| <b>Gomisin J</b>                   | 0.09 $\pm$ 0.01                              | 15.71 $\pm$ 2.47                     | 0.73 $\pm$ 0.04                    | 5.16 $\pm$ 0.46                      | 0.26 $\pm$ 0.02                    | 5.00 $\pm$ 0.470                     | 0.30 $\pm$ 0.03                    | 4.76 $\pm$ 0.20                     | 0.35 $\pm$ 0.07                    | 9.23 $\pm$ 0.83                     |
| <b>Gomisin A</b>                   | 1.32 $\pm$ 0.16                              | 91.53 $\pm$ 14.40                    | 7.42 $\pm$ 0.42                    | 41.11 $\pm$ 3.68                     | 2.59 $\pm$ 0.23                    | 44.74 $\pm$ 4.20                     | 3.24 $\pm$ 0.31                    | 38.78 $\pm$ 1.65                    | 3.72 $\pm$ 0.33                    | 69.87 $\pm$ 6.24                    |
| <b>Gomisin G</b>                   | 2.56 $\pm$ 0.30                              | 6.93 $\pm$ 1.09                      | 6.04 $\pm$ 0.34                    | 1.92 $\pm$ 0.17                      | 2.79 $\pm$ 0.25                    | 2.71 $\pm$ 0.25                      | 3.97 $\pm$ 0.38                    | 3.03 $\pm$ 0.13                     | 3.02 $\pm$ 0.27                    | 4.52 $\pm$ 0.40                     |
| <b>Licarín B</b>                   | 0.12 $\pm$ 0.01                              | 0.12 $\pm$ 0.02                      | 0.21 $\pm$ 0.01                    | 0.08 $\pm$ 0.01                      | 0.09 $\pm$ 0.01                    | 0.09 $\pm$ 0.01                      | 0.28 $\pm$ 0.03                    | traces                              | 0.19 $\pm$ 0.02                    | 0.10 $\pm$ 0.01                     |
| <b>Epigomisin O</b>                | 0.35 $\pm$ 0.04                              | 0.29 $\pm$ 0.05                      | 1.00 $\pm$ 0.06                    | 0.12 $\pm$ 0.01                      | 0.26 $\pm$ 0.02                    | 0.12 $\pm$ 0.01                      | 0.49 $\pm$ 0.05                    | 0.10 $\pm$ 0.004                    | 0.39 $\pm$ 0.04                    | 0.19 $\pm$ 0.02                     |
| <b>Gomisin O</b>                   | 2.26 $\pm$ 0.27                              | 1.82 $\pm$ 0.27                      | 4.80 $\pm$ 0.27                    | 0.60 $\pm$ 0.05                      | 1.34 $\pm$ 0.12                    | 0.55 $\pm$ 0.05                      | 2.64 $\pm$ 0.25                    | 0.62 $\pm$ 0.03                     | 2.37 $\pm$ 0.21                    | 0.93 $\pm$ 0.08                     |
| <b>Meso-dihydroguaiaretic acid</b> | traces                                       | 0.13 $\pm$ 0.02                      | 0.11 $\pm$ 0.01                    | 0.07 $\pm$ 0.01                      | 0.06 $\pm$ 0.01                    | 0.07 $\pm$ 0.01                      | 0.08 $\pm$ 0.01                    | 0.06 $\pm$ 0.003                    | traces                             | 0.23 $\pm$ 0.02                     |
| <b>Schisantherin A</b>             | 2.05 $\pm$ 0.24                              | 0.46 $\pm$ 0.07                      | 4.19 $\pm$ 0.23                    | 0.18 $\pm$ 0.02                      | 1.66 $\pm$ 0.15                    | 0.15 $\pm$ 0.01                      | 2.77 $\pm$ 0.27                    | 0.14 $\pm$ 0.01                     | 2.11 $\pm$ 0.19                    | 0.42 $\pm$ 0.04                     |
| <b>Schisantherin B</b>             | 0.80 $\pm$ 0.09                              | 16.66 $\pm$ 2.62                     | 2.82 $\pm$ 0.16                    | 5.35 $\pm$ 0.48                      | 0.89 $\pm$ 0.08                    | 6.43 $\pm$ 0.60                      | 1.57 $\pm$ 0.15                    | 5.60 $\pm$ 0.24                     | 1.28 $\pm$ 0.12                    | 10.21 $\pm$ 0.91                    |
| <b>Licarín A</b>                   | 9.71 $\pm$ 1.15                              | 1.81 $\pm$ 0.29                      | 8.68 $\pm$ 0.49                    | 4.19 $\pm$ 0.38                      | 30.83 $\pm$ 2.07                   | 3.88 $\pm$ 0.36                      | 9.64 $\pm$ 0.93                    | 1.80 $\pm$ 0.08                     | 5.04 $\pm$ 0.45                    | 4.04 $\pm$ 0.36                     |
| <b>Schisanhenol</b>                | 3.59 $\pm$ 0.43                              | 4.74 $\pm$ 0.75                      | 7.97 $\pm$ 0.45                    | 2.28 $\pm$ 0.20                      | 2.94 $\pm$ 0.26                    | 2.11 $\pm$ 0.20                      | 5.95 $\pm$ 0.57                    | 1.80 $\pm$ 0.08                     | 5.12 $\pm$ 0.46                    | 3.30 $\pm$ 0.30                     |
| <b>Deoxyschisandrin</b>            | 4.57 $\pm$ 0.54                              | 93.04 $\pm$ 14.64                    | 15.86 $\pm$ 0.89                   | 53.01 $\pm$ 4.75                     | 6.49 $\pm$ 0.57                    | 55.33 $\pm$ 5.19                     | 13.13 $\pm$ 1.26                   | 43.25 $\pm$ 1.84                    | 10.08 $\pm$ 0.91                   | 80.06 $\pm$ 7.15                    |
| <b>Fragransin A</b>                | traces                                       | traces                               | traces                             | traces                               | traces                             | traces                               | traces                             | traces                              | traces                             | traces                              |
| <b>Pregomisin</b>                  | traces                                       | traces                               | traces                             | traces                               | traces                             | traces                               | traces                             | traces                              | traces                             | traces                              |
| <b>Gomisin N</b>                   | 1.68 $\pm$ 0.20                              | 28.07 $\pm$ 4.42                     | 4.55 $\pm$ 0.25                    | 12.04 $\pm$ 1.08                     | 1.63 $\pm$ 0.14                    | 12.52 $\pm$ 1.17                     | 2.90 $\pm$ 0.28                    | 10.24 $\pm$ 0.44                    | 2.05 $\pm$ 0.18                    | 19.55 $\pm$ 1.75                    |
| <b>6-O-Benzylgomisin O</b>         | 0.32 $\pm$ 0.04                              | 1.22 $\pm$ 0.19                      | 0.82 $\pm$ 0.05                    | 0.40 $\pm$ 0.04                      | 0.34 $\pm$ 0.03                    | 0.52 $\pm$ 0.05                      | 0.57 $\pm$ 0.06                    | 0.40 $\pm$ 0.02                     | 0.38 $\pm$ 0.03                    | 0.83 $\pm$ 0.07                     |
| <b>Schisandrin C</b>               | 0.06 $\pm$ 0.01                              | 5.17 $\pm$ 0.81                      | 0.24 $\pm$ 0.01                    | 1.88 $\pm$ 0.17                      | 0.07 $\pm$ 0.01                    | 1.94 $\pm$ 0.18                      | 0.10 $\pm$ 0.01                    | 1.67 $\pm$ 0.07                     | 0.15 $\pm$ 0.01                    | 3.08 $\pm$ 0.28                     |
| <b>Total content</b>               | <b>37.80 <math>\pm</math> 4.47</b>           | <b>368.50 <math>\pm</math> 57.98</b> | <b>89.70 <math>\pm</math> 5.01</b> | <b>171.00 <math>\pm</math> 15.31</b> | <b>61.90 <math>\pm</math> 4.80</b> | <b>182.00 <math>\pm</math> 17.07</b> | <b>63.20 <math>\pm</math> 6.07</b> | <b>152.70 <math>\pm</math> 6.50</b> | <b>47.33 <math>\pm</math> 4.26</b> | <b>47.30 <math>\pm</math> 25.21</b> |
